# Supplementary material for: Intraoperative Radiotherapy for Resectable Pancreatic Cancer Using a Low-Energy X-Ray Source: Postoperative Complications and Early Outcomes
Source: PubMed Central journal article supplement — Yonsei Med J. 2022 Apr 20;63(5):405–12. doi: 10.3349/ymj.2022.63.5.405 (PMC9086690; doi:10.3349/ymj.2022.63.5.405), 2022-04-20
Supplement: ymj-63-405-s001.pdf [file ymj-63-405-s001.pdf]

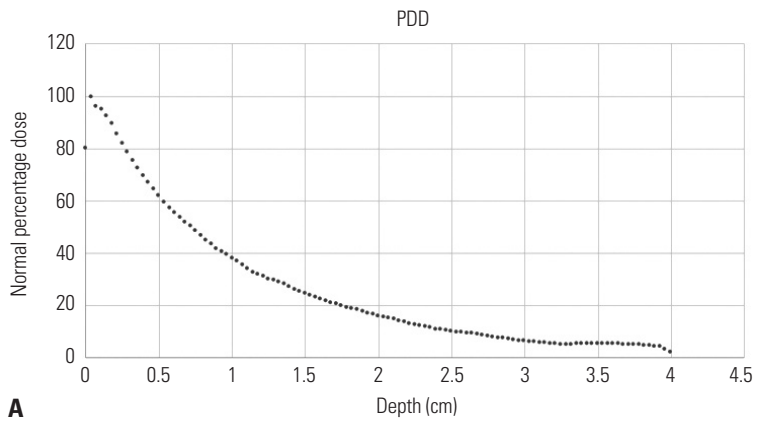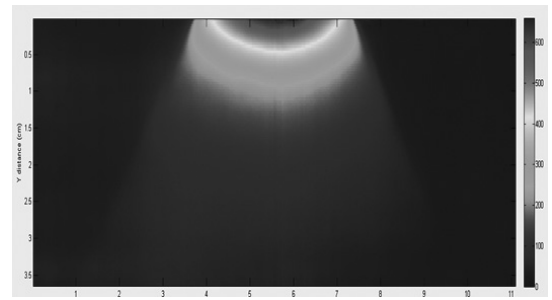

**A** **B**  
**Supplementary Fig. 1.** The percent depth dose (PDD) of applicator (A) and longitudinal central axis dose distribution of IORT (B). IORT, intraoperative radiotherapy.
