# Supplementary material for: Intraoperative Radiotherapy for Resectable Pancreatic Cancer Using a Low-Energy X-Ray Source: Postoperative Complications and Early Outcomes
Source: PubMed Central journal article supplement — Yonsei Med J. 2022 Apr 20;63(5):405–12. doi: 10.3349/ymj.2022.63.5.405 (PMC9086690; doi:10.3349/ymj.2022.63.5.405), 2022-04-20
Supplement: ymj-63-405-s002.pdf [file ymj-63-405-s002.pdf]

**Supplementary Table 1.** Comparison of Patient Characteristics between Low CA19-9 and High CA19-9 Groups

|                           | Low CA19-9<br>(n=20) | High CA19-9<br>(n=21) | <i>p</i> value |
|---------------------------|----------------------|-----------------------|----------------|
| Age (yr)                  |                      |                       | 0.162          |
| <70                       | 9 (45.0)             | 14 (66.7)             |                |
| ≥70                       | 11 (55.0)            | 7 (33.3)              |                |
| Sex                       |                      |                       | 0.162          |
| Male                      | 9 (45.0)             | 14 (66.7)             |                |
| Female                    | 11 (55.0)            | 7 (33.3)              |                |
| Location                  |                      |                       | 0.393          |
| Head/uncinicated process  | 14 (70.0)            | 12 (57.1)             |                |
| Body/tail                 | 6 (30.0)             | 9 (42.9)              |                |
| Tumor size (clinical, cm) | 2.8 (1.0–4.6)        | 3 (1.0–8.0)           | 0.283          |
| CEA (ng/mL)               | 2.4 (0.8–14.4)       | 3.9 (0.8–144.8)       | 0.141          |
| LVI                       |                      |                       | 0.155          |
| No                        | 13 (65.0)            | 9 (42.9)              |                |
| Yes                       | 7 (35.0)             | 12 (57.1)             |                |
| PNI                       |                      |                       | 0.067          |
| No                        | 5 (25.0)             | 1 (4.8)               |                |
| Yes                       | 15 (75.0)            | 20 (95.2)             |                |
| pT stage                  |                      |                       | 0.037          |
| T1–2                      | 15 (75.0)            | 9 (42.9)              |                |
| T3                        | 5 (25.0)             | 12 (57.1)             |                |
| pN stage                  |                      |                       | 0.658          |
| N0                        | 8 (40.0)             | 7 (33.3)              |                |
| N1–2                      | 12 (60.0)            | 14 (66.7)             |                |
| Margin status             |                      |                       | 0.929          |
| Negative                  | 15 (75.0)            | 16 (76.2)             |                |
| Positive                  | 5 (25.0)             | 5 (23.8)              |                |
| Degree of resection       |                      |                       | 0.719          |
| Wide R0                   | 16 (80.0)            | 15 (71.4)             |                |
| Narrow R0/R1              | 4 (20.0)             | 6 (28.6)              |                |

CA19-9, carbohydrate antigen 19-9; CEA, carcinoembryonic antigen; LVI, lymphovascular invasion; PNI, perineural invasion.

Data are presented as median (range) or n (%).
