# Supplementary material for: Intraoperative Radiotherapy for Resectable Pancreatic Cancer Using a Low-Energy X-Ray Source: Postoperative Complications and Early Outcomes
Source: PubMed Central journal article supplement — Yonsei Med J. 2022 Apr 20;63(5):405–12. doi: 10.3349/ymj.2022.63.5.405 (PMC9086690; doi:10.3349/ymj.2022.63.5.405), 2022-04-20
Supplement: ymj-63-405-s003.pdf [file ymj-63-405-s003.pdf]

**Supplementary Table 2.** Patterns of Failure according to Initial CA19-9

|                     | <b>Low CA19-9<br/>(n=20)</b> | <b>High CA19-9<br/>(n=21)</b> | <b><i>p</i> value</b> |
|---------------------|------------------------------|-------------------------------|-----------------------|
| Patterns of failure |                              |                               | 0.065                 |
| Local               | 1 (5.0)                      | 5 (23.8)                      |                       |
| Distant             | 9 (45.0)                     | 7 (33.3)                      |                       |
| Both                | 1 (5.0)                      | 6 (28.6)                      |                       |

CA19-9, carbohydrate antigen 19-9.  
Data are presented as n (%).
